# Supplementary material for: Tricyclic Guanidine Alkaloids from the Marine Sponge Acanthella cavernosa that Stabilize the Tumor Suppressor PDCD4
Source: PubMed Central journal article supplement (PMC4145332; doi:10.3390/md12084593), 2014-08-21
Supplement: marinedrugs-12-04593-s001.pdf [file marinedrugs-12-04593-s001.pdf]

## Supplementary Information

|                                                                                                                                                                                                                                                                       |     |
|-----------------------------------------------------------------------------------------------------------------------------------------------------------------------------------------------------------------------------------------------------------------------|-----|
| <b>Figure S1.</b> $^1\text{H}$ NMR spectrum of mirabilin G ( <b>1</b> ) naturally-occurring counterion in $\text{CDCl}_3$                                                                                                                                             | S2  |
| <b>Figure S2.</b> $^1\text{H}$ NMR spectrum of mirabilin G ( <b>1</b> ) naturally-occurring counterion in $\text{CDCl}_3$                                                                                                                                             | S3  |
| <b>Figure S3.</b> $^1\text{H}$ NMR spectrum of netamine M ( <b>2</b> ) naturally-occurring counterion in $\text{CDCl}_3$                                                                                                                                              | S4  |
| <b>Figure S4.</b> $^{13}\text{C}$ NMR spectrum of netamine M ( <b>2</b> ) naturally-occurring counterion in $\text{CDCl}_3$                                                                                                                                           | S5  |
| <b>Figure S5.</b> $^1\text{H}$ NMR spectrum of mirabilin K ( <b>3</b> ) trifluoroacetate salt in $\text{CDCl}_3$                                                                                                                                                      | S6  |
| <b>Figure S6.</b> $^{13}\text{C}$ NMR spectrum of mirabilin K ( <b>3</b> ) trifluoroacetate salt in $\text{CDCl}_3$                                                                                                                                                   | S7  |
| <b>Figure S7.</b> ROESY spectrum of mirabilin K ( <b>3</b> ) trifluoroacetate salt in $\text{CDCl}_3$                                                                                                                                                                 | S8  |
| <b>Figure S8.</b> HRESIMS spectrum of mirabilin K ( <b>3</b> ) trifluoroacetate salt                                                                                                                                                                                  | S9  |
| <b>Table S1.</b> $^1\text{H}$ (600 MHz) and $^{13}\text{C}$ (150 MHz) data in $\text{CDCl}_3$ for mirabilin G ( <b>1</b> ) naturally-occurring counterion, netamine M ( <b>2</b> ) naturally-occurring counterion, and mirabilin K ( <b>3</b> ) trifluoroacetate salt | S10 |

**Figure S1.**  $^1\text{H}$  NMR spectrum of mirabilin G (1) naturally-occurring counterion in  $\text{CDCl}_3$ .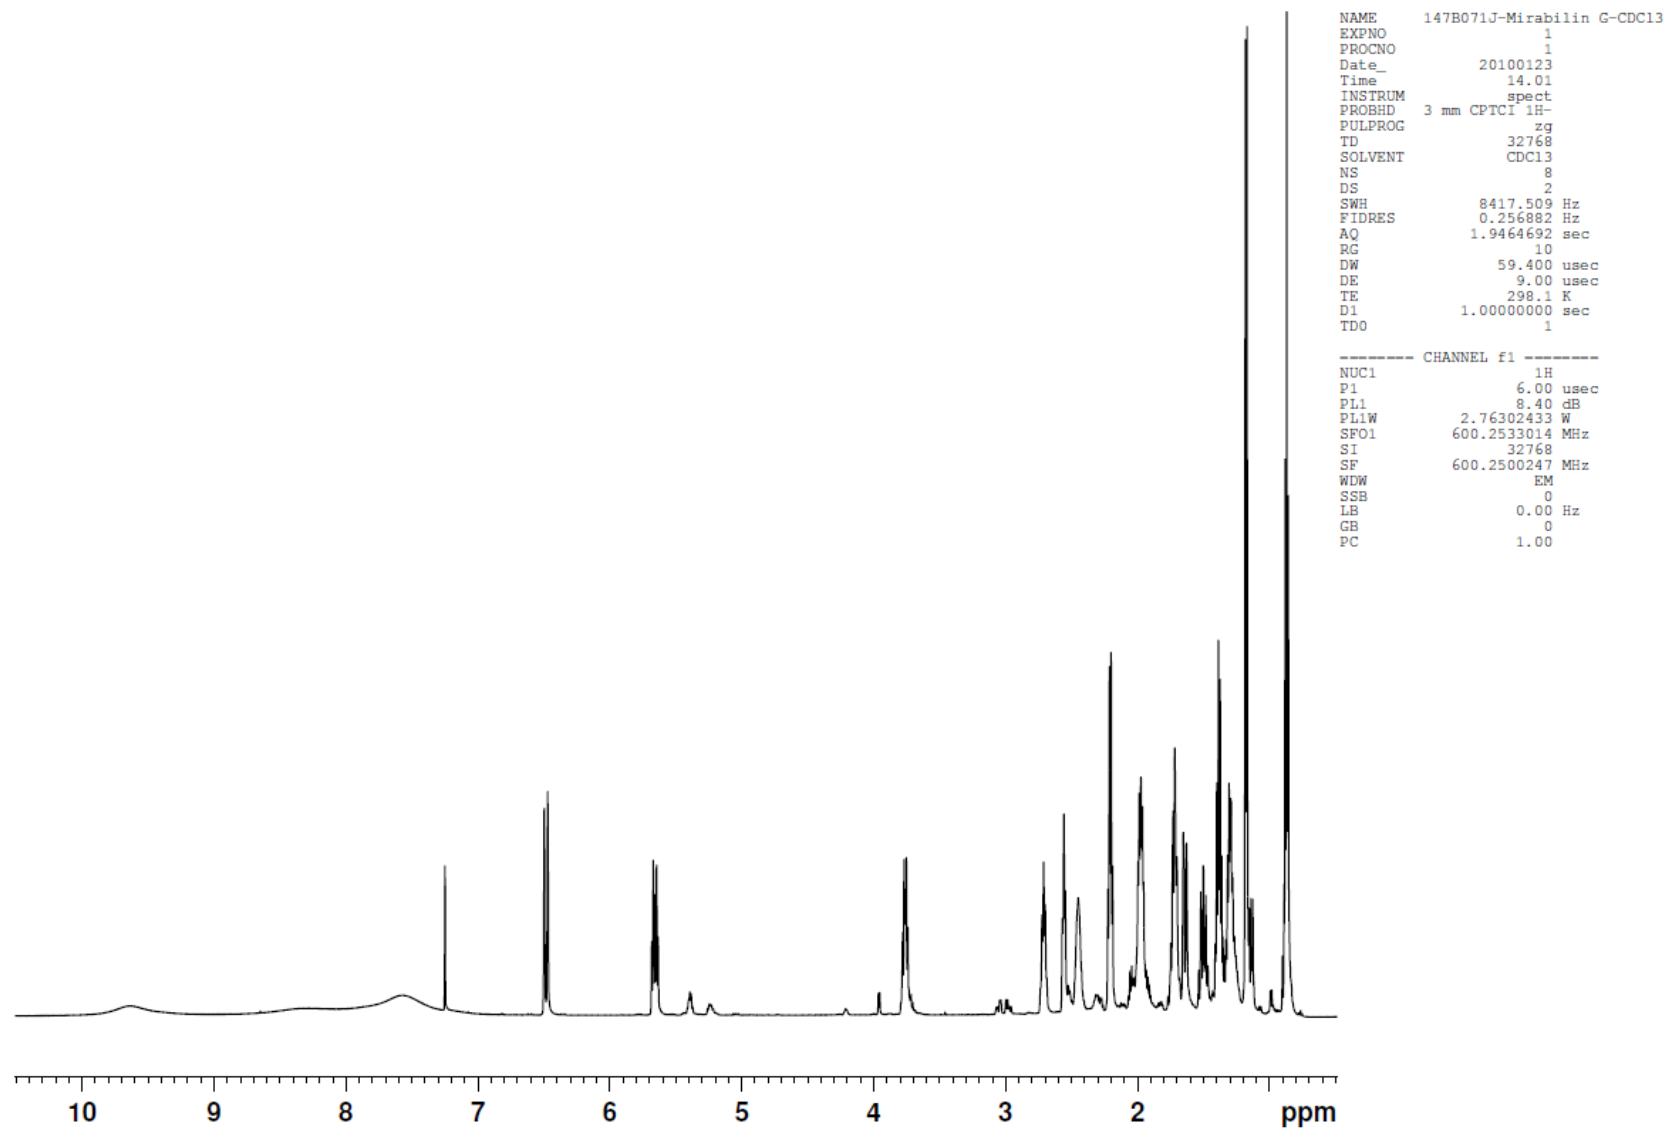

**Figure S2.**  $^{13}\text{C}$  NMR spectrum of mirabilin G (1) naturally-occurring counterion in  $\text{CDCl}_3$ .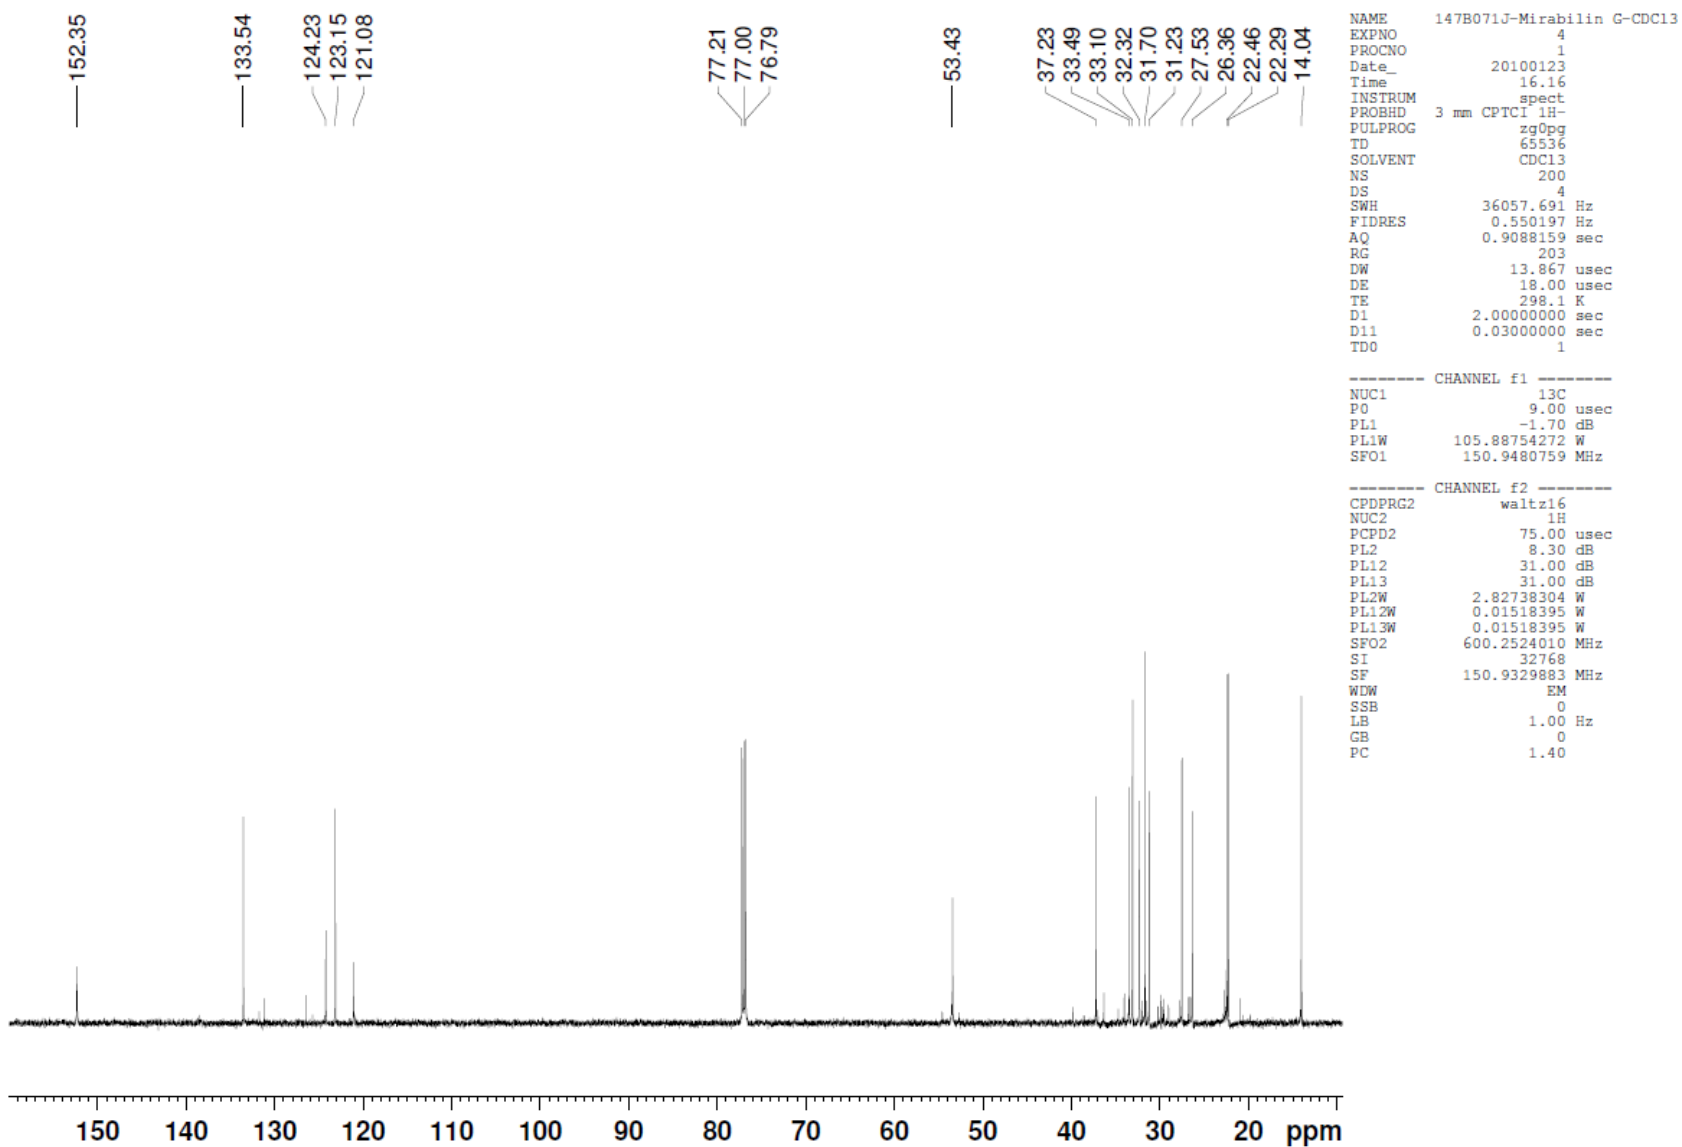

**Figure S3.**  $^1\text{H}$  NMR spectrum of netamine M (2) naturally-occurring counterion in  $\text{CDCl}_3$ .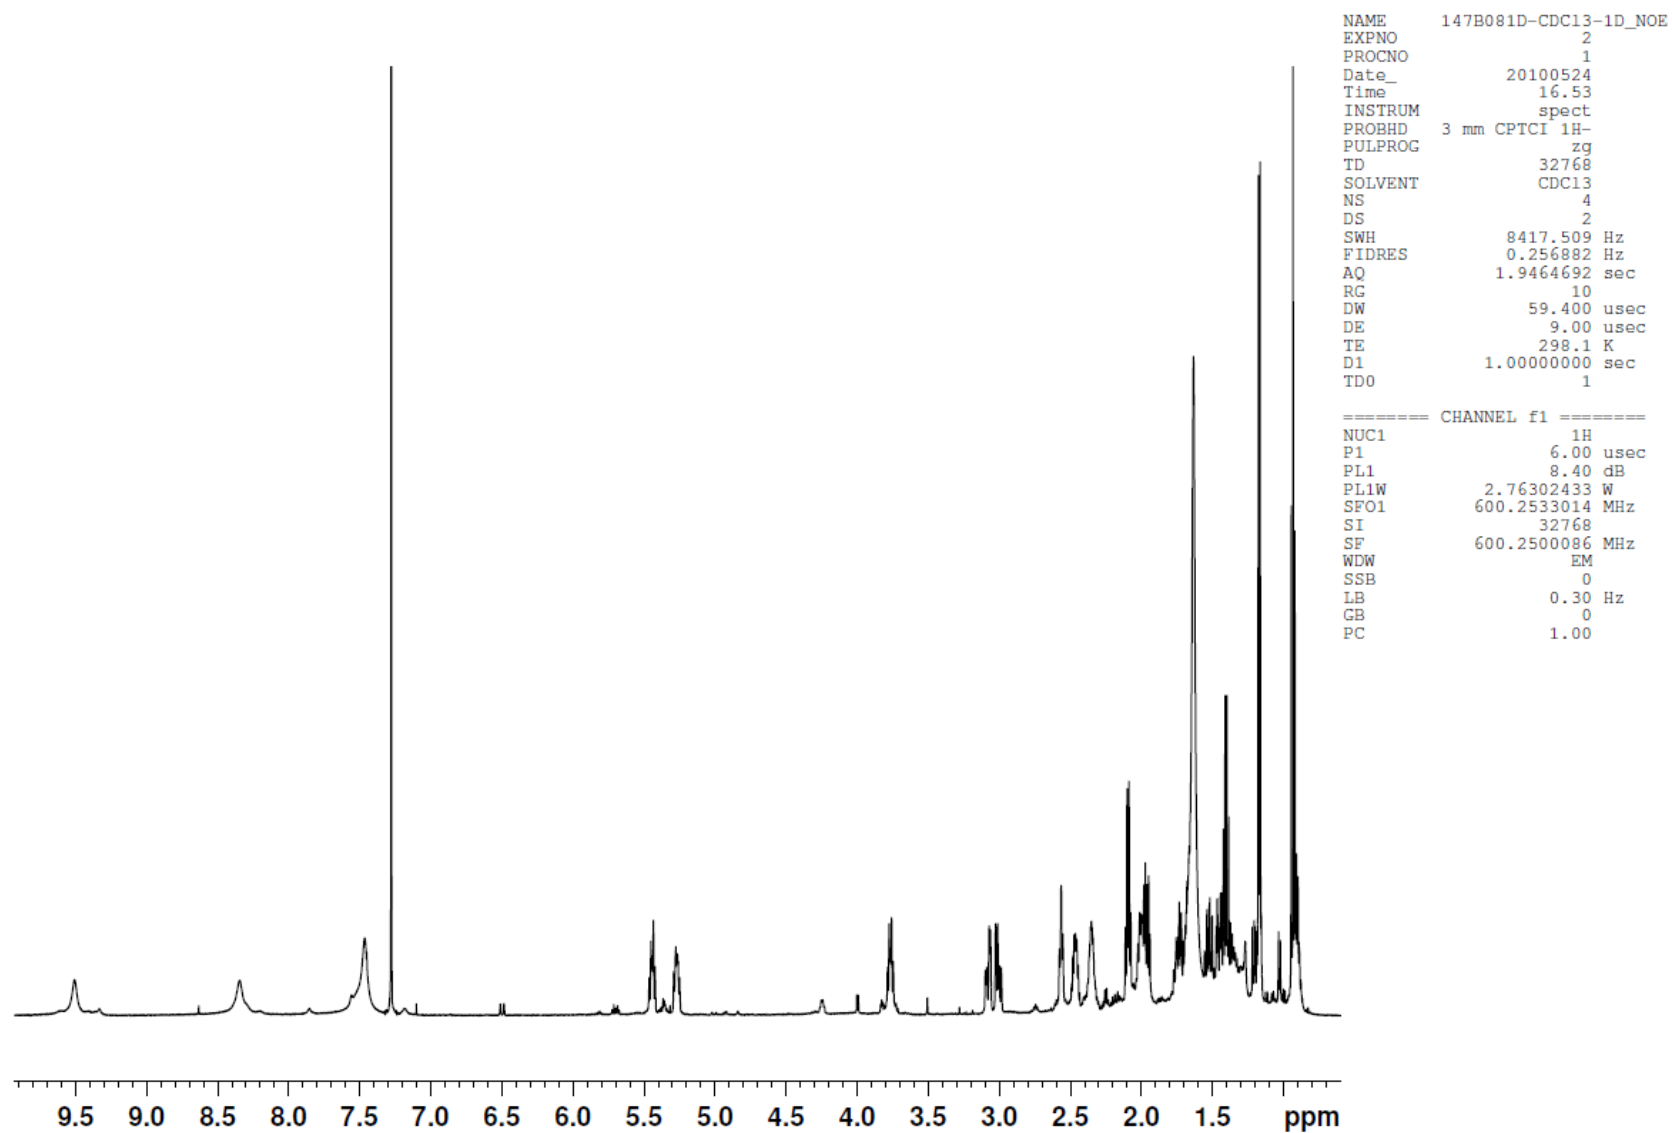

**Figure S4.**  $^{13}\text{C}$  NMR spectrum of netamine M (2) naturally-occurring counterion in  $\text{CDCl}_3$ .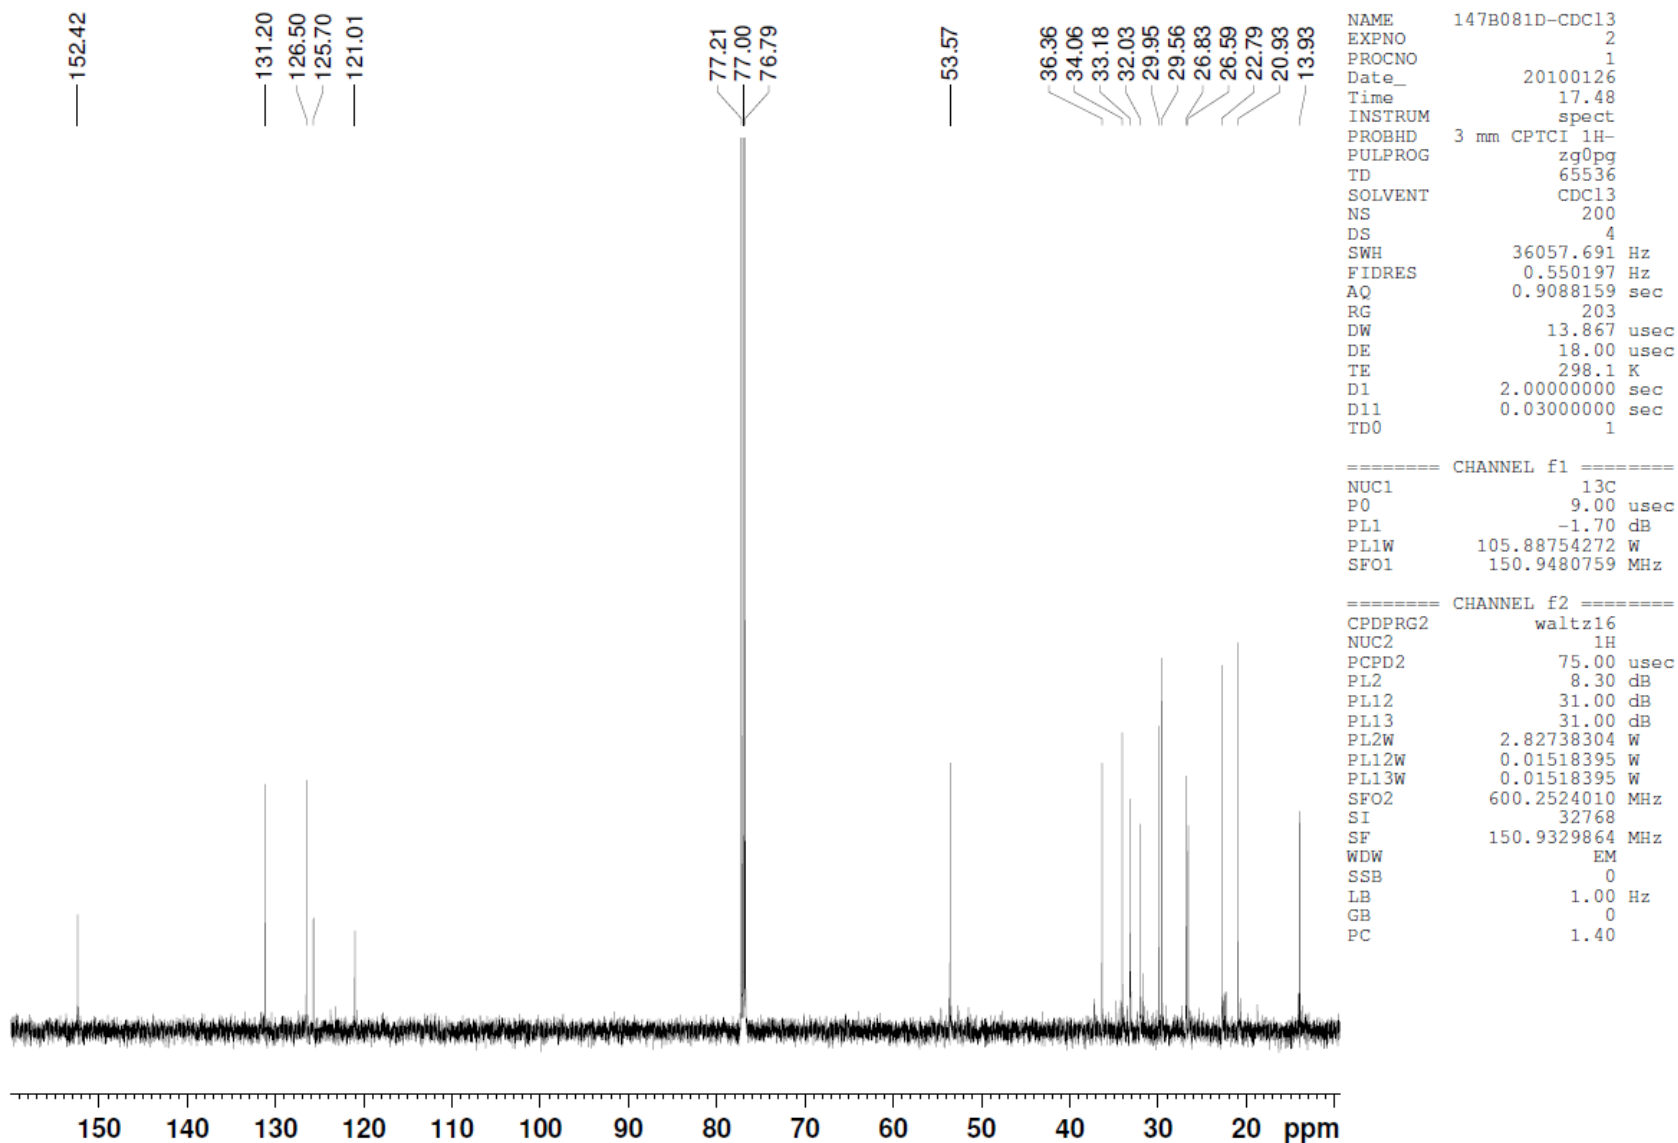

**Figure S5.**  $^1\text{H}$  NMR spectrum of mirabilin K (3) trifluoroacetate salt in  $\text{CDCl}_3$ .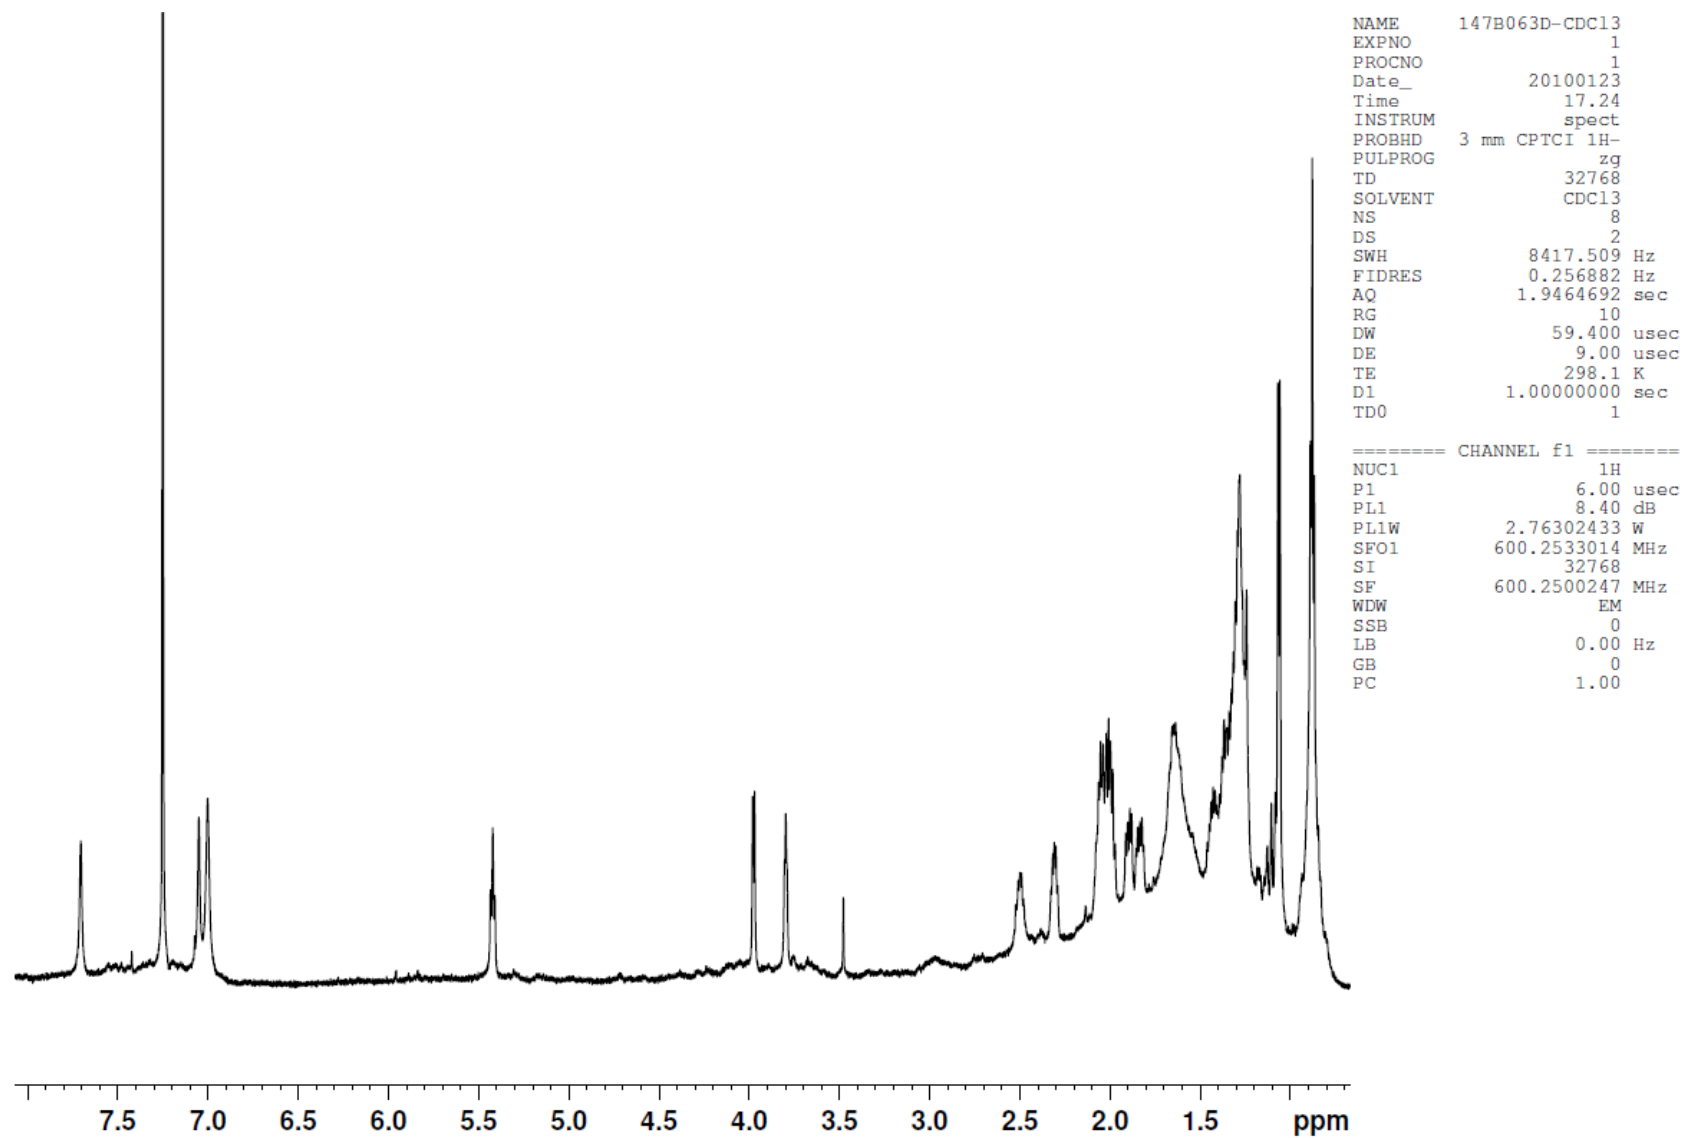

**Figure S6.**  $^{13}\text{C}$  NMR spectrum of mirabilin K (3) trifluoroacetate salt in  $\text{CDCl}_3$ .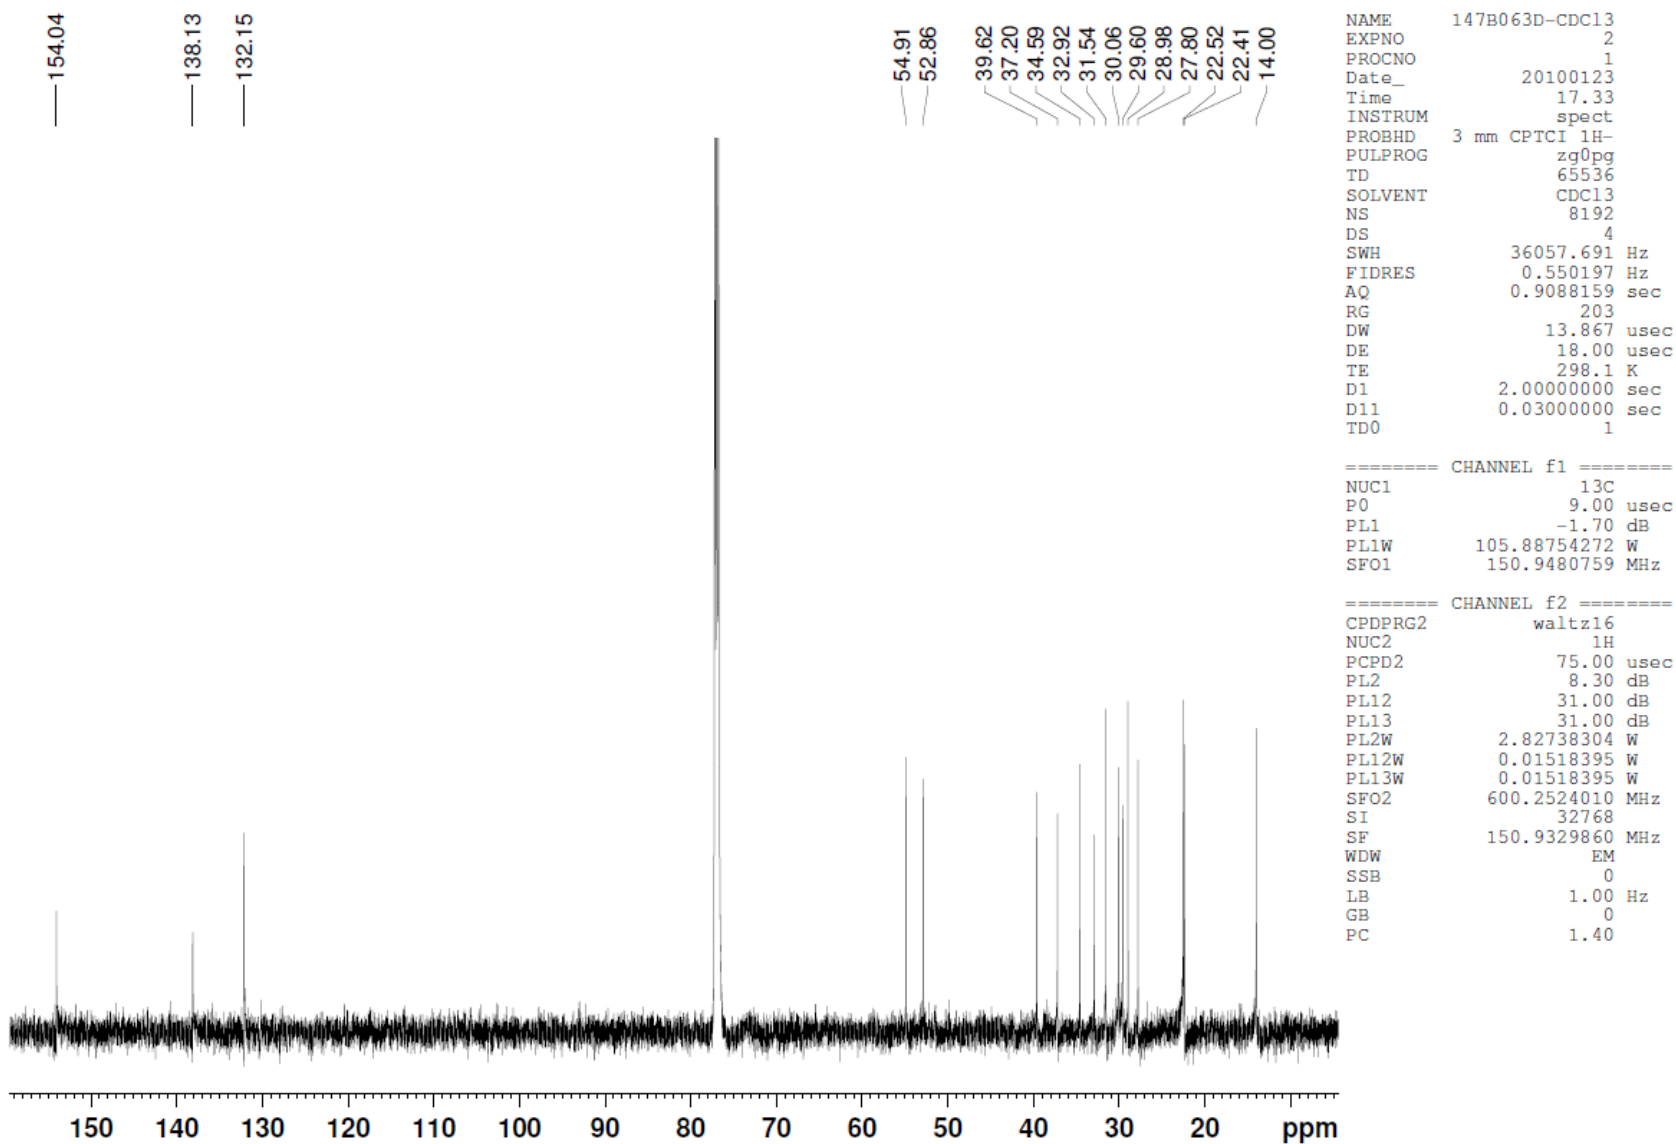

Figure S7. ROESY spectrum of mirabilin K (3) trifluoroacetate salt in CDCl<sub>3</sub>.

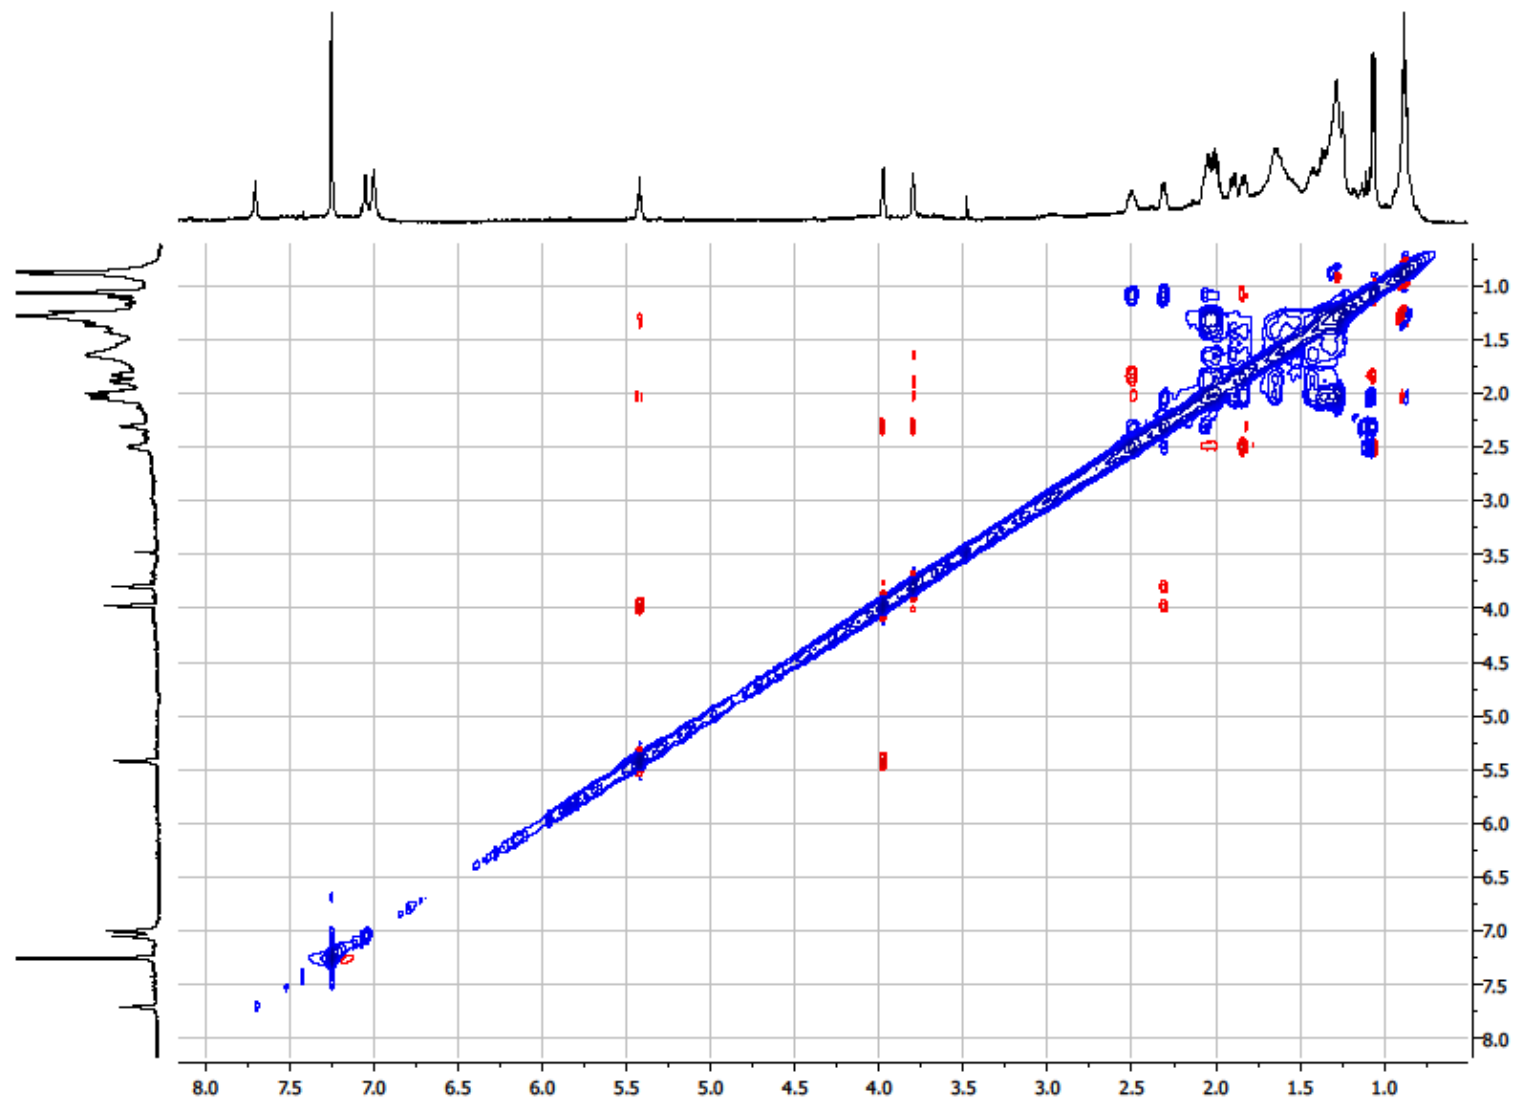



**Figure S8.** HRESIMS spectrum of mirabilin K (3) trifluoroacetate salt.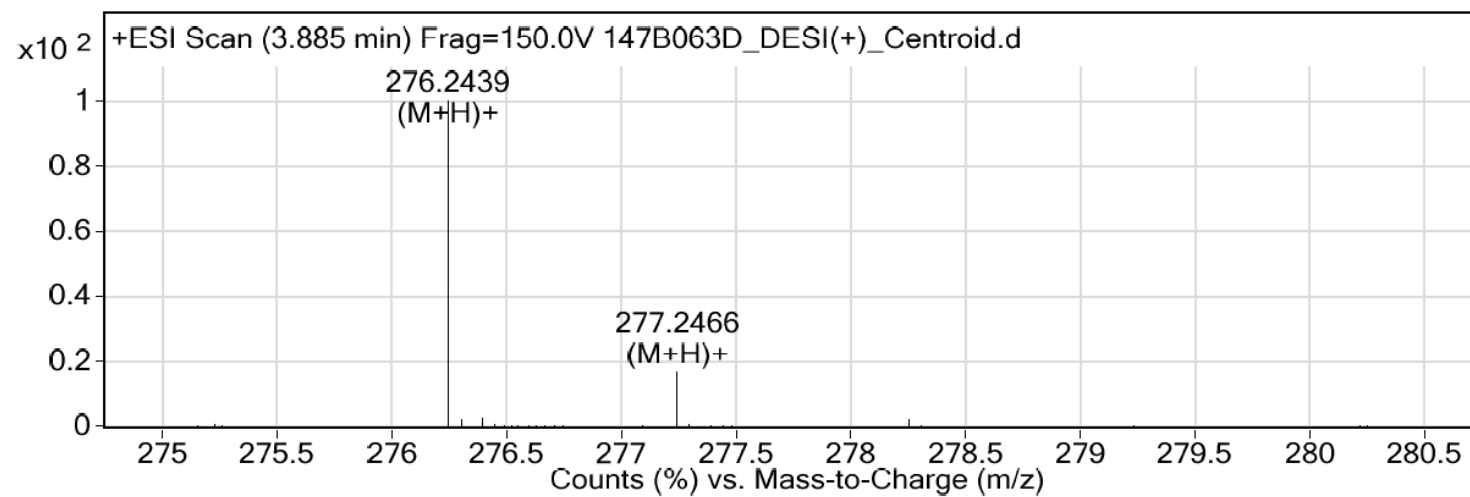

| Measured Mass | Molecular Formula                              | Calculated Mass | ppm | DBE |
|---------------|------------------------------------------------|-----------------|-----|-----|
| 276.2439      | C <sub>17</sub> H <sub>30</sub> N <sub>3</sub> | 276.2434        | 1.8 | 5   |

**Table S1.**  $^1\text{H}$  (600 MHz) and  $^{13}\text{C}$  (150 MHz) data in  $\text{CDCl}_3$  for mirabilin G (**1**) naturally-occurring counterion, netamine M (**2**) naturally-occurring counterion, and mirabilin K (**3**) trifluoroacetate salt.

| Position           | 1                          |                               | 2                          |                               | 3                          |                               |
|--------------------|----------------------------|-------------------------------|----------------------------|-------------------------------|----------------------------|-------------------------------|
|                    | $\delta_{\text{C}}$ , Type | $\delta_{\text{H}}$ (J in Hz) | $\delta_{\text{C}}$ , Type | $\delta_{\text{H}}$ (J in Hz) | $\delta_{\text{C}}$ , Type | $\delta_{\text{H}}$ (J in Hz) |
| 1-N                |                            | 9.63 br s                     |                            | 9.51 br s                     |                            | 7.71 br s                     |
| 2                  | 152.4, C                   |                               | 152.4, C                   |                               | 154.0, C                   |                               |
| C2-NH <sub>2</sub> |                            | 7.56 2H, br s                 |                            | 7.46 2H, br s                 |                            | 7.00 2H, br s                 |
| 3-N                |                            | 8.34 br s                     |                            | 8.35 br s                     |                            | 7.05 br s                     |
| 4                  | 53.4, CH                   | 3.76 dt (10.3, 6.8)           | 53.6, CH                   | 3.73 dt (10.4, 6.9)           | 52.9, CH                   | 3.80 br t (3.9)               |
| 5a                 | 32.3, CH <sub>2</sub>      | 1.98 m                        | 32.0, CH <sub>2</sub>      | 1.98 m                        | 32.9, CH <sub>2</sub>      | 1.89 m                        |
| 5b                 |                            | 1.50 m                        |                            | 1.49 m                        |                            | 1.64 m                        |
| 6a                 | 26.4, CH <sub>2</sub>      | 1.72 m                        | 26.8, CH <sub>2</sub>      | 1.71 m                        | 29.6, CH <sub>2</sub>      | 1.99 m                        |
| 6b                 |                            |                               |                            | 1.65 m                        |                            | 1.43 m                        |
| 7                  | 33.5, CH                   | 2.45 m                        | 34.1, CH                   | 2.43 m                        | 34.6, CH                   | 2.05                          |
| 8a                 | 31.2, CH <sub>2</sub>      | 1.98 m                        | 33.2, CH <sub>2</sub>      | 1.93 ddd (14.1, 6.3, 6.3)     | 37.2, CH <sub>2</sub>      | 1.84 ddd (13.5, 5.0, 5.0)     |
| 8b                 |                            | 1.64 m                        |                            | 1.42 ddd (14.1, 4.4, 4.4)     |                            | 1.10 ddd (13.5, 12.6, 12.6)   |
| 9                  | 27.5, CH                   | 2.71 dq (7.2, 7.3)            | 30.0, CH                   | 2.32 m                        | 30.0, CH                   | 2.50 m                        |
| 9-Me               | 22.5, CH <sub>3</sub>      | 1.18 3H, d (7.2)              | 20.9, CH <sub>3</sub>      | 1.14 3H, d (7.3)              | 22.4, CH <sub>3</sub>      | 1.06 3H, d (6.8)              |
| 10                 | 124.2, C                   |                               | 125.7, C                   |                               | 138.1, C                   |                               |
| 11                 | 121.1, C                   |                               | 121.0, C                   |                               | 54.9, CH                   | 3.98 d (6.3)                  |
| 12                 | 37.2, CH                   | 2.56 br t (6.8)               | 36.4, CH                   | 2.53 br t (6.9)               | 39.6, CH                   | 2.31 m                        |
| 1'a                | 123.2                      | 6.48 d (15.6)                 | 26.6, CH <sub>2</sub>      | 3.06 dd (15.6, 5.9)           | 132.2, C                   | 5.42 br t (7.1)               |
| 1b'                |                            |                               |                            | 2.98 dd (15.6, 8.5)           |                            |                               |
| 2'                 | 133.5, CH                  | 5.66 dt (6.9, 15.5)           | 126.5, CH                  | 5.25 m                        | 27.8, CH <sub>2</sub>      | 2.02 2H, m                    |
| 3'                 | 33.1, CH <sub>2</sub>      | 2.21 2H, m                    | 131.2, CH                  | 5.41 m                        | 29.6, CH <sub>2</sub>      | 1.24 2H, m                    |
| 4'                 | 31.7, CH <sub>2</sub>      | 1.38 2H, m                    | 29.6, CH <sub>2</sub>      | 2.06 2H, m                    | 31.5, CH <sub>2</sub>      | 1.26 2H, m                    |
| 5'                 | 22.3, CH <sub>2</sub>      | 1.30 2H, m                    | 22.8, CH <sub>2</sub>      | 1.37 2H, m                    | 22.5, CH <sub>2</sub>      | 1.28 2H, m                    |
| 6'                 | 14.0, CH <sub>3</sub>      | 0.87 3H, t (7.2)              | 13.9, CH <sub>3</sub>      | 0.90 3H, t (7.3)              | 14.0, CH <sub>3</sub>      | 0.88 3H, t (6.8)              |
